# Supplementary material for: Hsa_circ_0060450 Negatively Regulates Type I Interferon-Induced Inflammation by Serving as miR-199a-5p Sponge in Type 1 Diabetes Mellitus
Source: PubMed Central journal article supplement (PMC7550460; doi:10.3389/fimmu.2020.576903), 2020-09-29
Supplement: Data_Sheet_1.pdf [file Data_Sheet_1.pdf]

## Supplementary materials

### ***Hsa\_circ\_0060450* negatively regulates type I interferon-induced inflammation by serving as miR-199a-5p sponge in type 1 diabetes mellitus**

Lan Yang<sup>1,2#</sup>, Xiao Han<sup>1,2#</sup>, Caiyan Zhang<sup>1,2#</sup>, Chengjun Sun<sup>3#</sup>, Saihua Huang<sup>1,2</sup>, Wenfeng Xiao<sup>1,2</sup>, Yajing Gao<sup>1,2</sup>, Qiuyan Liang<sup>1,2</sup>, Feihong Luo<sup>3</sup>, Wei Lu<sup>3</sup>, Jinrong Fu<sup>1\*</sup> and Yufeng Zhou<sup>1,2\*</sup>

<sup>1</sup> Institute of Pediatrics, Children's Hospital of Fudan University, and the Shanghai Key Laboratory of Medical Epigenetics, International Co-laboratory of Medical Epigenetics and Metabolism, Ministry of Science and Technology, Institutes of Biomedical Sciences, Fudan University, Shanghai 200032, China

<sup>2</sup> National Health Commission (NHC) Key Laboratory of Neonatal Diseases, Fudan University, Shanghai, China

<sup>3</sup> Department of Pediatric Endocrinology and Inherited Metabolic Diseases, Children's Hospital of Fudan University, Shanghai, 201102, China

**Running title:** *Hsa\_circ\_0060450* regulates inflammation in T1DM

# L.Y., X.H., C.Z., C.S. contributed equally to this work.

\*To whom correspondence should be addressed:

Yufeng Zhou, M.D., Ph.D., 399 Wanyuan Rd, Minhang, Shanghai 201102, China.

E-mail: yfzhou1@fudan.edu.cn ; or Jinrong Fu , M.D., Ph.D., 399 Wanyuan Rd,

Minhang, Shanghai 201102, China. E-mail: fujinrong@hotmail.com

**Figure S1 The full length of *hsa\_circ\_0060450*.**

**hsa\_circ\_0060450 circRNA Mature Sequence**

CGAGGATCTGGATGAGCTGCACTACCAGGACACAGATTCAGATGTGCCGGAGCAGAGGGAT  
AGCAAGTGCAAGGTCAAATGGACCCATGAGGAGGACGAGCAGCTGAGGGCCCTGGTGAG  
GCAGTTTGGACAGCAGGACTGGAAGTTCCTGGCCAGCCACTTCCTAACCGCACTGACCAG  
CAATGCCAGTACAGGTGGCTGAGAGTTTTGAATCCAGACCTTGTC AAGGGGCCATGGACCA  
AAGAGGAAGACCAAAAAGTCATCGAGCTGGTTAAGAAGTATGGCACAAAGCAGTGGACAC  
TGATTGCCAAGCACCTGAAGGGCCGGCTGGGGAAGCAGTGCCGTGAACGCTGGCACAAACC  
ACCTCAACCCTGAGGTGAAGAAGTCTTGCTGGACCGAGGAGGAGGACCGCATCATCTGCGA  
GGCCACAAGGTGCTGGGCAACCGCTGGGCCGAGATCGCCAAGATGTTGCCAGGGAG

**Figure S2**

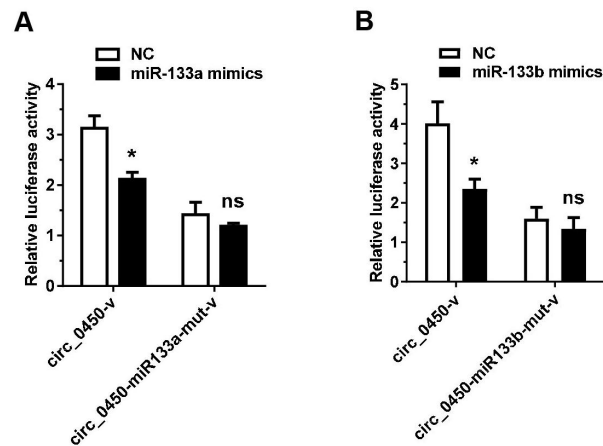

**Figure S2** The target sequence of miR-133a or miR-133b in *hsa\_circ\_0060450* was confirmed by binding sites-mutant luciferase assay. **(A)** Luciferase reporter assay to detect the luciferase activity of 293T cells co-transfected with psicheck2 recombinant vector containing mutant *hsa\_circ\_0060450* fragment and miR-133a or NC. **(B)** Luciferase reporter assay to detect the luciferase activity of 293T cells co-transfected with psicheck2 recombinant vector containing mutant *hsa\_circ\_0060450* fragment and miR-133b or NC. NC, negative control. circ\_0450-v, psicheck2 recombinant vector containing WT *hsa\_circ\_0060450* fragment. circ\_0450-miR133a-mut-v, psicheck2 recombinant vector containing miR133a binding site-mutant *hsa\_circ\_0060450* fragment. circ\_0450-miR133b-mut-v, psicheck2 recombinant vector containing miR133b binding site-mutant *hsa\_circ\_0060450* fragment. Data represent means  $\pm$  SEM. \* $p < 0.05$ . ns, not significance.

**Figure S3**

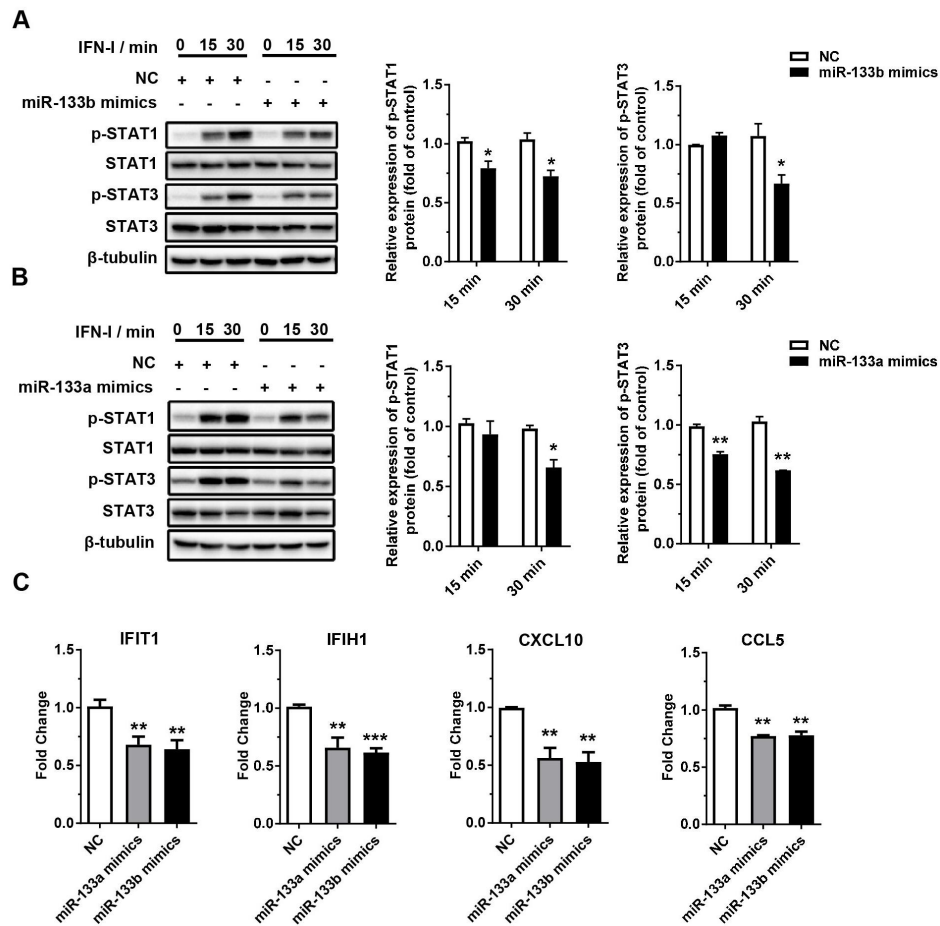

**Figure S3 miR-133a and miR-133b inhibited the activation of IFN-I signal. (A)** STAT1 and STAT3 protein phosphorylation assessment (left) and quantification analysis (right) at 15 min and 30 min of IFN-I stimulation after treatment with miR-133b mimics. **(B)** STAT1 and STAT3 protein phosphorylation assessment (left) and quantification analysis (right) at 15 min and 30 min of IFN-I stimulation after treatment with miR-133a mimics. **(C)** RT-qPCR analyses of *IFIT1*, *IFIH1*, *CXCL10*, and *CCL5* under IFN-I stimulation after treatment with miR-133a and miR-133b mimics. NC, negative control. Data represent means  $\pm$  SEM. \* $p < 0.05$ , \*\* $p < 0.01$ , \*\*\* $p < 0.001$ .

**Figure S4**

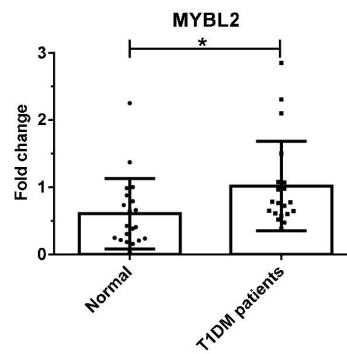

**Figure S4** The expression of *MYBL2* is upregulated in T1DM patients. RT-qPCR analysis of the expression of *MYBL2* in the PBMCs of T1DM patients and healthy controls. Data represent means  $\pm$  SEM. \* $p < 0.05$ .

**Table S1 Sequences of siRNAs and microRNA mimics**

| <b>Name</b>         | <b>Target RNA</b>       | <b>Sense sequence ( 5'- 3')</b> |
|---------------------|-------------------------|---------------------------------|
| si-circ_0450-1      | <i>hsa_circ_0060450</i> | GUUGCCAGGGAGCGAGGAUTT           |
| si-circ_0450-2      | <i>hsa_circ_0060450</i> | CAGGGAGCGAGGAUCUGGATT           |
| si-SHP2             | SHP2                    | GUUGACAAGAGGAGUUGAUTT           |
| miR-199a -5p mimics | -                       | CCCAGUGUUCAGACUACCUGUUC         |
| miR-133a-3p mimics  | -                       | UUUGGUCCCCUUCAACCAGCUG          |
| miR-133b mimics     | -                       | UUUGGUCCCCUUCAACCAGCUA          |
| NC                  | -                       | UUCUCCGAACGUGUCACGUTT           |

**Table S2 Primer sequences used for amplification**

| <b>Name</b>   | <b>Usage</b> | <b>Sequence ( 5'- 3')</b>           |
|---------------|--------------|-------------------------------------|
| β-actin       | qPCR forward | CACCATTGGCAATGAGCGGTTC              |
|               | qPCR reverse | AGGTCTTTGCGGATGTCCACGT              |
| circ_0450     | qPCR forward | AGGGAGCGAGGATCTGGA                  |
|               | qPCR reverse | CGGTTAGGGAAGTGGCTGG                 |
| MYBL2         | qPCR forward | CACCAGAAACGAGCCTGCCTTA              |
|               | qPCR reverse | CTCAGGTCACACCAAGCATCAG              |
| IFIT1         | qPCR forward | GCCTTGCTGAAGTGTGGAGGAA              |
|               | qPCR reverse | ATCCAGGCGATAGGCAGAGATC              |
| IFIH1         | qPCR forward | GCTGAAGTAGGAGTCAAAGCCC              |
|               | qPCR reverse | CCACTGTGGTAGCGATAAGCAG              |
| iNOS          | qPCR forward | GCTCTACACCTCCAATGTGACC              |
|               | qPCR reverse | CTGCCGAGATTTGAGCCTCATG              |
| CXCL10        | qPCR forward | GGTGAGAAGAGATGTCTGAATCC             |
|               | qPCR reverse | GTCCATCCTTGGAAGCACTGCA              |
| SHP2          | qPCR forward | GACTTTTGGCGGATGGTGTTC               |
|               | qPCR reverse | CGGCGCTTTCTTTGACGTTCT               |
| SHP1          | qPCR forward | TTGACCACAGCCGAGTGATCCT              |
|               | qPCR reverse | CTGGCGATGTAGGTCTTAGCGT              |
| SOCS1         | qPCR forward | TTCGCCCTTAGCGTGAAGATGG              |
|               | qPCR reverse | TAGTGCTCCAGCAGCTCGAAGA              |
| SOCS3         | qPCR forward | CATCTCTGTCGGAAGACCGTCA              |
|               | qPCR reverse | GCATCGTACTGGTCCAGGAACT              |
| PTP1B         | qPCR forward | TGTCTGGCTGATACCTGCCTCT              |
|               | qPCR reverse | ATCAGCCCCATCCGAAACTTCC              |
| circ_0450-v   | PCR forward  | CCGCTCGAGGTGAGGCAGTTTGGACAGC        |
|               | PCR reverse  | ATTTGCGGCCGCGGCAACATCTTGGCGATC      |
| circ_0450-miR | PCR forward  | GAAGCAGTGCCGACTTGCGACCCACAACCACCTCA |

|               |             |                                     |
|---------------|-------------|-------------------------------------|
| 199a-mut-v    | PCR reverse | TGAGGTGGTTGTGGGTCGCAAGTCGGCACTGCTTC |
| circ_0450-miR | PCR forward | GACCAAAGAGGAACTGGTTTAAGTCATCGAGCTGG |
| 133a/b-mut-v  | PCR reverse | CCAGCTCGATGACTTAAACCAGTTCCTCTTTGGTC |
| SHP2-v        | PCR forward | CCGCTCGAGTCAAGAACAGACGCAAGAA        |
|               | PCR reverse | ATTTGCGGCCGCAGCCAAACTACCCCAAAG      |

---
